# Supplementary material for: The Evaluation of Dark Chocolate-Elicited Emotions and Their Relation with Physico Chemical Attributes of Chocolate
Source: PubMed Central journal article supplement (PMC8002928; doi:10.3390/foods10030642), 2021-03-18
Supplement: foods-10-00642-s001.pdf [file foods-10-00642-s001.pdf]

**Table S1.** Pearson correlations between overall acceptability and emotion response of the dark chocolate samples.

|                              |                     | <b>Overall acceptability</b> |
|------------------------------|---------------------|------------------------------|
| <b>Overall Acceptability</b> | Pearson Correlation | 1                            |
|                              | Sig. (2-tailed)     |                              |
| <b>Neutral</b>               | Pearson Correlation | -0,265                       |
|                              | Sig. (2-tailed)     | 0,405                        |
| <b>Happy</b>                 | Pearson Correlation | 0,310                        |
|                              | Sig. (2-tailed)     | 0,327                        |
| <b>Sad</b>                   | Pearson Correlation | -0,083                       |
|                              | Sig. (2-tailed)     | 0,796                        |
| <b>Angry</b>                 | Pearson Correlation | -0,126                       |
|                              | Sig. (2-tailed)     | 0,695                        |
| <b>Surprised</b>             | Pearson Correlation | -0,091                       |
|                              | Sig. (2-tailed)     | 0,778                        |
| <b>Scared</b>                | Pearson Correlation | 0,496                        |
|                              | Sig. (2-tailed)     | 0,101                        |
| <b>Disgusted</b>             | Pearson Correlation | -0,167                       |
|                              | Sig. (2-tailed)     | 0,603                        |
| <b>Contempt</b>              | Pearson Correlation | -0,580*                      |
|                              | Sig. (2-tailed)     | 0,048                        |
| <b>Valence</b>               | Pearson Correlation | -0,114                       |
|                              | Sig. (2-tailed)     | 0,723                        |

\*. Correlation is significant at the 0.05 level (2-tailed).

**Table S2.** Pearson correlations between overall acceptability and emotions response of the dark chocolate samples with fatty acids.

| Fatty acids                       | Overall acceptability |              | Happy          |              | Sad           |              | Angry           |               | Surprised       |              | Scared          |              | Disgusted      |              | Contempt       |              | Valence        |                |              |
|-----------------------------------|-----------------------|--------------|----------------|--------------|---------------|--------------|-----------------|---------------|-----------------|--------------|-----------------|--------------|----------------|--------------|----------------|--------------|----------------|----------------|--------------|
|                                   | <i>r</i>              | <i>p</i>     | <i>r</i>       | <i>p</i>     | <i>r</i>      | <i>p</i>     | <i>r</i>        | <i>p</i>      | <i>r</i>        | <i>p</i>     | <i>r</i>        | <i>p</i>     | <i>r</i>       | <i>p</i>     | <i>r</i>       | <i>p</i>     | <i>r</i>       | <i>p</i>       |              |
| <b>C8:0</b>                       | -0.492                | 0.104        | -0.306         | 0.334        | -0.102        | 0.752        | <b>0.887**</b>  | <b>0.0001</b> | -0.073          | 0.822        | 0.393           | 0.206        | -0.414         | 0.181        | 0.235          | 0.462        | 0.123          | 0.704          |              |
| <b>C10:0</b>                      | -0.491                | 0.105        | -0.305         | 0.335        | -0.101        | 0.756        | <b>0.887**</b>  | <b>0.0001</b> | -0.072          | 0.823        | 0.394           | 0.205        | -0.413         | 0.182        | 0.237          | 0.458        | 0.123          | 0.702          |              |
| <b>C12:0</b>                      | -0.492                | 0.104        | -0.306         | 0.334        | -0.103        | 0.751        | <b>0.887**</b>  | <b>0.0001</b> | -0.073          | 0.822        | 0.393           | 0.206        | -0.414         | 0.18         | 0.234          | 0.464        | 0.122          | 0.705          |              |
| <b>C14:0</b>                      | -0.484                | 0.11         | -0.312         | 0.323        | -0.1          | 0.758        | <b>0.890**</b>  | <b>0.0001</b> | -0.079          | 0.806        | 0.39            | 0.21         | -0.41          | 0.186        | 0.228          | 0.475        | 0.116          | 0.719          |              |
| <b>C16:0</b>                      | <b>-0.624*</b>        | <b>0.03</b>  | 0.314          | 0.32         | -0.452        | 0.14         | 0.035           | 0.914         | <b>0.832**</b>  | <b>0.001</b> | <b>0.733**</b>  | <b>0.007</b> | <b>-0.661*</b> | <b>0.019</b> | <b>0.700*</b>  | <b>0.011</b> | 0.345          | 0.273          |              |
| <b>C16:1</b>                      | 0.502                 | 0.096        | -0.376         | 0.228        | 0.124         | 0.701        | <b>0.666*</b>   | <b>0.018</b>  | 0.168           | 0.602        | 0.551           | 0.063        | -0.054         | 0.867        | 0.34           | 0.28         | -0.4           | 0.198          |              |
| <b>C17:0</b>                      | -0.116                | 0.719        | -0.093         | 0.774        | -0.051        | 0.875        | <b>0.700*</b>   | <b>0.011</b>  | 0.467           | 0.126        | <b>0.824**</b>  | <b>0.001</b> | -0.455         | <b>0.137</b> | <b>0.748**</b> | 0.005        | 0.039          | 0.904          |              |
| <b>C18:0</b>                      | <b>0.657*</b>         | <b>0.02</b>  | 0.126          | 0.697        | 0.148         | 0.647        | <b>-0.763**</b> | <b>0.004</b>  | -0.079          | 0.807        | -0.462          | 0.131        | 0.499          | 0.098        | -0.367         | 0.241        | -0.288         | 0.364          |              |
| <b>C18:0</b><br><i>cis. trans</i> | 0.478                 | 0.116        | 0.377          | 0.227        | 0.307         | 0.332        | <b>-0.891**</b> | <b>0.0001</b> | -0.171          | 0.595        | <b>-0.595*</b>  | <b>0.041</b> | <b>0.577*</b>  | <b>0.05</b>  | -0.33          | 0.295        | 0.005          | 0.989          |              |
| <b>C18:2</b>                      | -0.277                | 0.383        | 0.447          | 0.145        | <b>0.703*</b> | <b>0.011</b> | -0.135          | 0.675         | <b>-0.784**</b> | <b>0.003</b> | <b>-0.709**</b> | <b>0.01</b>  | 0.508          | 0.092        | -0.246         | 0.44         | <b>0.670*</b>  | <b>0.017</b>   |              |
| <b>C18:3<math>\gamma</math></b>   | <b>0.688*</b>         | <b>0.013</b> | -0.275         | 0.386        | 0.486         | 0.109        | -0.074          | 0.818         | <b>-0.785**</b> | <b>0.002</b> | <b>-0.702*</b>  | <b>0.011</b> | <b>0.730**</b> | <b>0.007</b> | <b>-0.683*</b> | <b>0.014</b> | -0.344         | 0.274          |              |
| <b>C18:3<math>\alpha</math></b>   | <b>0.660*</b>         | <b>0.02</b>  | -0.519         | 0.084        | -0.479        | 0.115        | -0.038          | 0.907         | 0.463           | 0.129        | 0.35            | 0.264        | -0.147         | 0.648        | -0.069         | 0.832        | -              | <b>0.846**</b> | <b>0.001</b> |
| <b>C20:0</b>                      | <b>0.797**</b>        | <b>0.002</b> | -0.343         | 0.275        | 0.467         | 0.125        | 0.007           | 0.983         | <b>-0.689*</b>  | <b>0.013</b> | -0.563          | 0.057        | <b>0.680*</b>  | <b>0.015</b> | -0.571         | 0.053        | -0.442         | 0.151          |              |
| <b>C20:1</b>                      | <b>0.779**</b>        | <b>0.003</b> | -0.179         | 0.578        | <b>0.647*</b> | <b>0.023</b> | 0.01            | 0.976         | <b>-0.696*</b>  | <b>0.012</b> | -0.542          | 0.069        | <b>0.769**</b> | <b>0.003</b> | -0.419         | 0.175        | -0.264         | 0.407          |              |
| <b>C22:0</b>                      | -0.361                | 0.249        | <b>0.718**</b> | <b>0.009</b> | <b>0.660*</b> | <b>0.02</b>  | 0.042           | 0.897         | -0.065          | 0.84         | 0.088           | 0.785        | 0.105          | 0.745        | <b>0.597*</b>  | <b>0.04</b>  | <b>0.857**</b> | <b>0.0001</b>  |              |

*r* – Pearson correlation; *p* – significance; correlation significant. when  $p \leq 0.05$  (\*) or  $p \leq 0.01$  (\*\*).

**Table S3.** Volatile compounds (%) of the dark chocolate identified by HS-SPME GC-MS.

| Volatile compounds                    | Odour description                                                          | Retention time, min | Dark chocolate samples group   |                 |                 |                 |
|---------------------------------------|----------------------------------------------------------------------------|---------------------|--------------------------------|-----------------|-----------------|-----------------|
|                                       |                                                                            |                     | S1                             | S2              | S3              | S4              |
|                                       |                                                                            |                     | Volatile compound peak area, % |                 |                 |                 |
| Acetic acid                           | Sour, vinegary                                                             | 3.128               | 71.61<br>±1.90a                | 67.90<br>±2.16a | 70.53<br>±2.34a | 78.23<br>±2.41b |
| Propanoic acid, 2-methyl-             | Fruity, rum-like                                                           | 6.605               | nd                             | 1.82<br>±0.29b  | nd              | 0.14<br>±0.03a  |
| 2,3-Butanediol, [R-(R*, R*)]          | Fruity, creamy, buttery                                                    | 6.694               | 2.17<br>±0.20a                 | 2.14<br>±0.18a  | 1.84<br>±0.19a  | 2.62<br>±0.11b  |
| 2,3-Butanediol                        | Fruity, creamy, buttery                                                    | 6.707               | nd                             | nd              | 6.17<br>±0.89b  | 1.49<br>±0.29a  |
| Acetic acid, ethoxyhydroxyethyl ester | Ethereal fruity sweet weedy green                                          | 6.860               | nd                             | 1.12±0.29       | nd              | nd              |
| Lactate <ethyl>                       | Sweet, fruity, acidic, ethereal                                            | 6.920               | nd                             | 3.35<br>±0.92   | nd              | nd              |
| 2,3-Butanediol, [S-(R*, R*)]          | Fruity, rum-like                                                           | 6.950               | 2.60<br>±0.78                  | nd              | nd              | nd              |
| Threo-3-bromo-2-pentanol              | -                                                                          | 7.560               | nd                             | nd              | nd              | 0.19<br>±0.03   |
| Butanoic acid, 3-methyl-              | Sweet, diffusive, estry, fruity, sharp, pineapple, apple, green and orange | 8.819               | 1.70<br>±0.25c                 | nd              | 0.06<br>±0.01a  | 1.02<br>±0.29b  |
| Pentanoic acid, 3-methyl-             | Characteristic, fresh notes of walnut, dry, woody                          | 9.004               | nd                             | 0.05<br>±0.01   | nd              | nd              |
| Butanoic acid, 3-methyl-              | Rancid, cheesy                                                             | 9.005               | 0.41<br>±0.10                  | nd              | nd              | nd              |
| Butyric acid <2-methyl->              | Acidic, fruity, dirty, cheesy with a fermented nuance                      | 9.079               | 0.44<br>±0.11b                 | 0.43<br>±0.10b  | 0.43<br>±0.10b  | 0.19<br>±0.05a  |
| 1-Butanol, 3-methyl-, acetate         | Sweet, banana, fruity with a ripe estry nuance                             | 9.357               | nd                             | nd              | 0.13<br>±0.04   | nd              |
| L-lactic acid                         | Odorless                                                                   | 9.490               | 0.05<br>±0.01a                 | 1.29<br>±0.21b  | nd              | nd              |
| Pentanoic acid                        | Sweat                                                                      | 9.655               | 0.39<br>±0.09c                 | 0.27<br>±0.04b  | 0.31<br>±0.05b  | 0.14<br>±0.05a  |
| 2-Butenoic acid, 3-methyl-            | Green phenolic dairy                                                       | 9.765               | 0.12<br>±0.03                  | nd              | nd              | nd              |
| 2-Heptanol                            | Mushroom                                                                   | 9.860               | 0.48<br>±0.08b                 | nd              | nd              | nd              |
| 2-Hexanol, 5-methyl-                  | -                                                                          | 9.892               | nd                             | nd              | 0.55<br>±0.11b  | 0.21<br>±0.08a  |
| Pyrazine, 2,3-dimethyl-               | Musty, nut skins, cocoa powdery and roasted with potato and coffee nuances | 10.295              | 0.30<br>±0.07b                 | 0.15<br>±0.08a  | 0.55<br>±0.10c  | 0.46<br>±0.06c  |
| 1-Methoxy-2-propyl acetate            | Mild odour                                                                 | 10.537              | 0.40<br>±0.13a                 | 1.44<br>±0.17b  | 0.64<br>±0.12a  | 0.59<br>±0.11a  |
| Pentanoic acid, 4-methyl-             | Pungent, cheese-like                                                       | 11.066              | 0.07<br>±0.03b                 | 0.02<br>±0.01a  | 0.12<br>±0.04b  | 0.09<br>±0.02b  |
| Benzaldehyde                          | Strong sharp sweet bitter almond cherry                                    | 11.250              | 0.07<br>±0.01a                 | 0.73<br>±0.10c  | 0.92<br>±0.11c  | 0.60<br>±0.10b  |

|                                  |                                                                                                              |        |                 |                |                |                |
|----------------------------------|--------------------------------------------------------------------------------------------------------------|--------|-----------------|----------------|----------------|----------------|
| Hexanoic acid                    | Cheesy fruity phenolic fatty goaty                                                                           | 11.788 | 0.86<br>±0.08b  | 0.68<br>±0.08a | 0.65<br>±0.10a | 0.51<br>±0.12a |
| Heptane, 2,2,4,6,6-pentamethyl-  | -                                                                                                            | 11.909 | 0.49<br>±0.09   | nd             | nd             | nd             |
| Cyclohexanol, 4-(1,1-dimethyl)-  | Woody musty patchouli camphor mint leather                                                                   | 11.916 | nd              | nd             | nd             | 0.37<br>±0.11  |
| Cyclohexene, 3-(1-methylpropyl)- | Raw green herbal                                                                                             | 11.920 | nd              | 0.40<br>±0.10a | 0.41<br>±0.11a | nd             |
| Cyclotetrasiloxane, octamethyl-  | -                                                                                                            | 12.056 | 0.42<br>±0.08a  | 0.40<br>±0.07a | nd             | nd             |
| Pyrazine, trimethyl-             | Nutty, musty, powdery cocoa, potato and musty                                                                | 12.136 | nd              | nd             | nd             | 1.03<br>±0.11b |
| (+)-4-Carene                     | -                                                                                                            | 12.337 | 0.10<br>±0.02   | nd             | nd             | nd             |
| Octane, 2,3,3-trimethyl-         | Green, spicy, cilantro, fatty, leafy, cortex, herbal                                                         | 12.354 | nd              | nd             | nd             | 0.29<br>±0.05  |
| Heptane, 2,5,5-trimethyl-        | -                                                                                                            | 12.540 | nd              | 0.07<br>±0.01  | nd             | nd             |
| Decane, 2,3,4-trimethyl-         | -                                                                                                            | 12.547 | nd              | nd             | 0.08<br>±0.03  | 0.04<br>±0.02a |
| 2-Heptanol, acetate              | Fresh lemon grass, herbal, sweet, floral, fruity, green                                                      | 12.905 | 0.01<br>±0.001a | nd             | 0.06<br>±0.01b | 0.07<br>±0.01b |
| Pentane, 2,2-oxybis-             | Sweet                                                                                                        | 13.140 | nd              | 0.11<br>±0.01  | nd             | nd             |
| Pentadecane                      | Waxy                                                                                                         | 13.225 | nd              | 0.26<br>±0.03  | nd             | nd             |
| Heptadecane                      | -                                                                                                            | 13.230 | nd              | nd             | 0.32<br>±0.06  | nd             |
| Nonane, 5-(2-methylpropyl)-      | Fruity, straw, caramel burnt                                                                                 | 13.237 | nd              | nd             | nd             | 0.47<br>±0.07  |
| Ethanone, 1-(1H-pyrrol-2-yl)-    | Musty, nutty-like with a coumarin nuance                                                                     | 13.293 | 0.39<br>±0.07a  | 0.31<br>±0.09a | 0.36<br>±0.08a | 0.33<br>±0.06a |
| 2-Pyrrolidinone                  | -                                                                                                            | 13.405 | nd              | nd             | nd             | 0.08           |
| Acetophenone                     | Sweet, cherry pit, marzipan and coumarinic, It has a slight almond nutty and heliotropin-like vanilla nuance | 13.486 | 0.39<br>±0.10a  | 0.34±0.08a     | 0.33<br>±0.09a | nd             |
| Heptanoic acid                   | Cheesy, waxy, sweaty, fermented, pineapple and fruity                                                        | 13.531 | nd              | 0.33±0.08b     | 0.34<br>±0.07b | 0.18<br>±0.06a |
| Pyrazine, 3-ethyl-3,5-dimethyl-  | Peanut, nutty, caramel, coffee, musty, cocoa, pyrazine and roasted                                           | 13.647 | nd              | nd             | nd             | 0.31<br>±0.07a |
| Pyrazine, 3-ethyl-2,5-dimethyl-  | Potato, cocoa, roasted, nutty                                                                                | 13.652 | 0.23<br>±0.07a  | nd             | 0.37<br>±0.09a | nd             |
| H-Methyldodecanol                | -                                                                                                            | 13.710 | nd              | 0.07±0.02      | nd             | nd             |
| 1-Heptanol, 2,4-diethyl          | -                                                                                                            | 13.720 | nd              | nd             | 0.15<br>±0.03  | nd             |
| 2-Undecene, 2,5-dimethyl         | -                                                                                                            | 13.731 | nd              | nd             | nd             | 0.09<br>±0.02  |

|                                               |                                                                                                                          |        |                |                |                |                |
|-----------------------------------------------|--------------------------------------------------------------------------------------------------------------------------|--------|----------------|----------------|----------------|----------------|
| Pyrazine, tetramethyl-                        | Nutty, musty and vanilla with dry, brown cocoa nuances                                                                   | 13.787 | 0.68<br>±0.10a | 1.57<br>±0.17b | 1.76<br>±0.12b | 0.79<br>±0.11a |
| 2-Nonanone                                    | Fruity, sweet, waxy, soapy, cheese, green herbaceous, coconut like                                                       | 13.840 | nd             | nd             | nd             | 0.48±0.11      |
| Sulfurous acid, isobuthyl 2-pentyl ester      | Orange juicy, impacting, musty green unripe fruity reminiscent of banana and vegetative nuances with a slight nutty note | 14.017 | 0.62<br>±0.12  | nd             | nd             | nd             |
| 1,6-Octadien-3-ol, 3,7-dimethyl-              | Citrus, orange, floral, terpy, waxy and rose                                                                             | 14.019 | nd             | 0.99<br>±0.11a | 0.94<br>±0.12a | 0.81<br>±0.09a |
| Nonanal                                       | Waxy, aldehydic, citrus, with a fresh slightly green lemon peel like nuance, and a cucumber fattiness                    | 14.077 | 0.40<br>±0.07  | nd             | nd             | nd             |
| 2-Isopryl-5-methylhes-2-enal                  | Herbal, lavender, woody, green, blueberry, tomato                                                                        | 14.166 | nd             | nd             | nd             | 0.21<br>±0.08  |
| Phenethyl alcohol                             | Sweet, floral, fresh and bready with a rosey honey nuance                                                                | 14.299 | 0.50<br>±0.07a | 0.49<br>±0.09a | 0.61<br>±0.09a | 0.43<br>±0.08a |
| 1-Heptanol, 6-methyl-                         | -                                                                                                                        | 14.606 | 0.05<br>±0.01  | nd             | nd             | nd             |
| 4H-Pyran-4-one, 2,3-dihydro-3,5-dihydroxy-6   | -                                                                                                                        | 14.804 | nd             | 0.26±0.04      | nd             | nd             |
| Cyclopentasiloxane, decamethyl-               | -                                                                                                                        | 14.896 | 0.54<br>±0.09b | 0.26<br>±0.08a | 1.99<br>±0.17c | 0.44<br>±0.07b |
| Octanoic acid                                 | Fatty, waxy, rancid, oily, vegetable, cheesy                                                                             | 15.224 | 0.69<br>±0.10a | 0.67<br>±0.09a | 0.72<br>±0.10a | 0.52<br>±0.09a |
| 3-Cyclohexen-1-ol, 4-methyl-1-(1-methylethyl) | Musty dusty                                                                                                              | 15.455 | 0.04<br>±0.01a | nd             | nd             | 0.02<br>±0.01a |
| Octanoic acid, ethyl ester                    | Waxy, sweet, musty, pineapple and fruity with a creamy, dairy nuance                                                     | 15.640 | 0.07<br>±0.01a | nd             | 0.08<br>±0.02a | 0.07<br>±0.01a |
| Tetradecane <n>                               | Mild waxy                                                                                                                | 15.708 | nd             | 0.26±0.08      | nd             | nd             |
| Dodecane                                      | -                                                                                                                        | 15.719 | 0.23<br>±0.09  | nd             | 0.26<br>±0.07a | nd             |
| Pentadecane <n>                               | Waxy                                                                                                                     | 15.723 | nd             | nd             | nd             | 0.14<br>±0.03a |
| Estragole                                     | Sweet, phenolic, anise, harsh, spice, green, herbal, minty                                                               | 15.773 | 0.59<br>±0.09b | 0.57<br>±0.08b | 0.54<br>±0.07b | 0.33<br>±0.06a |
| Sulfurous acid, decyl 2-ethylhexyl ester      | -                                                                                                                        | 15.938 | nd             | 0.07±0.01      | nd             | nd             |
| Undecane, 2,6-dimethyl-                       | -                                                                                                                        | 15.945 | 0.05<br>±0.01  | nd             | nd             | nd             |
| Decane, 2,6,7-trimethyl-                      | -                                                                                                                        | 15.951 | nd             | nd             | 0.07<br>±0.01a | 0.05<br>±0.01a |
| Thymoquinone                                  | Pencil-like                                                                                                              | 16.613 | 0.35±0.08a     | 0.34<br>±0.06a | 0.35<br>±0.06a | 0.20<br>±0.09a |

|                                                 |                                                                                             |        |                |                 |                 |                |
|-------------------------------------------------|---------------------------------------------------------------------------------------------|--------|----------------|-----------------|-----------------|----------------|
| Phenethyl isobutyrate                           | Heavy fruity, honey and yeasty, with balsamic nuances and waxy rosy floral notes on dry out | 16.674 | 0.15<br>±0.07a | 0.19<br>±0.04a  | 0.22<br>±0.06a  | nd             |
| Acetic acid, 2-phenylethyl ester                | Sweet, honey, floral rosy, with a slight yeasty honey note with a cocoa and balsamic nuance | 16.678 | nd             | nd              | nd              | 0.20<br>±0.05  |
| Nonanoic acid                                   | Waxy, dirty and cheesy with a cultured dairy nuance                                         | 16.779 | 1.47<br>±0.09b | 1.59<br>±0.09b  | 1.64<br>±0.10b  | 1.28<br>±0.07a |
| 2H-Pyran-2-one, 5,6-dihydro-6-pentyl-           | -                                                                                           | 16.869 | 0.15<br>±0.04a | 0.10<br>±0.03a  | 0.17<br>±0.07a  | 0.09<br>±0.03a |
| Hentriacontane <n>                              | -                                                                                           | 16.993 | 0.09<br>±0.02  | nd              | nd              | nd             |
| Dodecane, 4,6-dimethyl-                         | -                                                                                           | 16.998 | nd             | 0.10<br>±0.04a  | 0.12<br>±0.03a  | 0.17<br>±0.04a |
| Phenol, 2-methyl-5-(1-methylethyl-)             | Spicy, cooling, thymol-like, herbal and camphoreous with smoky nuances                      | 17.195 | 1.02<br>±0.12b | 1.04<br>±0.11b  | 1.03<br>±0.12b  | 0.67<br>±0.10a |
| Nonane, 5-methyl-5-propyl-                      | -                                                                                           |        | nd             | nd              | nd              | 0.03±0.01      |
| Nonane, 3-methyl-5-propyl-                      | -                                                                                           | 17.273 | 0.09<br>±0.02b | nd              | nd              | 0.04<br>±0.01a |
| Pentadecane <n>                                 | Waxy                                                                                        | 17.279 | nd             | nd              | 0.09<br>±0.02   | nd             |
| Tridecane <n>                                   | -                                                                                           | 17.283 | nd             | 0.07±0.02       | nd              | nd             |
| Thymol                                          | Spicy, phenolic and thymol with a chemical, medicinal, camphoreous nuance                   | 17.359 | 0.08<br>±0.02a | 0.09<br>±0.02a  | 0.07<br>±0.01a  | 0.07<br>±0.01a |
| Octadecane, 1-(ethenyloxy-)                     | -                                                                                           | 17.408 | nd             | nd              | nd              | 0.06±0.01      |
| Cyclohexasiloxane, dodecylmethyl-               | Odorless                                                                                    | 17.614 | 0.52<br>±0.11b | 0.14<br>±0.04a  | 0.23<br>±0.06a  | 0.23<br>±0.06a |
| Nonane, 3-methyl-5-propyl-                      | -                                                                                           | 17.680 | 0.05<br>±0.01a | nd              | 0.07<br>±0.01a  | nd             |
| Eicosane                                        | Waxy                                                                                        | 17.689 | nd             | 0.06±0.07a      | nd              | nd             |
| Dodecane, 4,6-dimethyl-                         | -                                                                                           | 17.691 | nd             | nd              | nd              | 0.08±0.01      |
| 1-Alanine, N-cyclopropylcarbonyl-, methyl ester | -                                                                                           | 17.863 | 0.02<br>±0.01a | nd              | 0.03<br>±0.01a  | nd             |
| 3H-Pyrazol-3-one, 2,4-dihydro-2,5-dimethyl      | -                                                                                           | 17.871 | nd             | nd              | nd              | 0.03±0.01      |
| Sarcosine, N-cyclopropylcarbonyl-, octyl ester  | Sweet, fruity, oily-waxy, with a green creamy nuance                                        | 17.867 | nd             | 0.02±0.01       | nd              | nd             |
| Decanoic acid <n>                               | Unpleasant rancid sour fatty citrus                                                         | 18.195 | 0.30<br>±0.06b | 0.23<br>±0.06ab | 0.24<br>±0.07ab | 0.17<br>±0.03a |
| Propanoic acid, 2-methyl-, 3-hydroxy-2,4,4-tri  | -                                                                                           | 18.487 | 0.44<br>±0.07b | 0.29<br>±0.06a  | 0.23<br>±0.06a  | 0.12<br>±0.07a |
| Copaene                                         | Woody, spicy, honey                                                                         | 18.626 | nd             | nd              | 0.05<br>±0.01   | nd             |
| Hexadecane, 1-iodo-                             | -                                                                                           | 18.734 | nd             | nd              | 0.14<br>±0.02   | nd             |
| Methylenegenol                                  | -                                                                                           | 18.845 | 0.08<br>±0.02a | 0.07<br>±0.02a  | 0.06<br>±0.02a  | 0.05<br>±0.02a |

|                                                   |                                                                |        |                |                |                 |                |
|---------------------------------------------------|----------------------------------------------------------------|--------|----------------|----------------|-----------------|----------------|
| 2,4,7,9-Tetramethyl-5-decyn-4,7-diol              | -                                                              | 18.983 | 0.19<br>±0.03b | 0.17<br>±0.04b | 0.18<br>±0.04b  | 0.09<br>±0.02a |
| 1-Heptafluorobutyryloxydecane                     | -                                                              | 19.771 | nd             | 0.02±0.01      | nd              | nd             |
| Tridecanol <n->                                   | Musty                                                          | 19.779 | 0.03<br>±0.01  | nd             | nd              | nd             |
| Cycloheptasiloxane, tetradecamethyl-              | -                                                              | 20.038 | 0.18<br>±0.04b | 0.07<br>±0.01a | 0.13<br>±0.03b  | 0.08<br>±0.01a |
| 2-methylhexacosane                                | -                                                              | 20.092 | nd             | nd             | 0.09<br>±0.01   | nd             |
| Eicosane                                          | Waxy                                                           | 20.100 | 0.07<br>±0.01a | 0.08<br>±0.02a | nd              | 0.06<br>±0.01a |
| Phenol, 2,4-bis(1,1-dimethylethyl-)               | -                                                              | 20.330 | 0.02<br>±0.01  | nd             | nd              | nd             |
| Diethyl Phthalate                                 | Odorless                                                       | 20.995 | 0.21<br>±0.08a | 0.32<br>±0.07a | 0.24<br>±0.06a  | 0.18<br>±0.07a |
| Heptadecane, 2,6,10,15-tetramethyl-               | -                                                              | 21.390 | nd             | nd             | 0.01<br>±0.001  | nd             |
| Cyclooctasiloxane, hexadecamethyl-                | -                                                              | 22.148 | 0.15<br>±0.05a | 0.10<br>±0.03a | 0.10<br>±0.03a  | 0.07<br>±0.03a |
| Tetradecanoic acid                                | Faint, waxy and fatty with a hint of pineapple and citrus peel | 23.061 | 0.22<br>±0.04b | 0.11<br>±0.02a | 0.10<br>±0.03a  | 0.07<br>±0.03a |
| n-Nanodecanol-1                                   | Fatty, waxy, floral, orange, sweet, clean, watery              | 23.361 | 0.02<br>±0.01  | nd             | nd              | nd             |
| 2-Propanol, 1-chloro-, phosphate (3:1)            | -                                                              | 23.531 | 0.07<br>±0.01a | 0.09<br>±0.02a | 0.07<br>±0.01a  | 0.06<br>±0.01a |
| Cyclononasiloxane, octadecamethyl-                | -                                                              | 23.605 | 0.17<br>±0.04b | 0.13<br>±0.02b | 0.08<br>±0.02a  | 0.07<br>±0.01a |
| Benzoic acid, hexyl ester                         | Fresh, balsam, sappy, clean, woody                             | 23.816 | 0.04<br>±0.01a | 0.03<br>±0.01a | 0.03<br>±0.01a  | nd             |
| Pentadecanoic acid                                | Waxy                                                           | 23.875 | 0.02<br>±0.01  | nd             | nd              | nd             |
| Morpholine, 4-octadecyl-                          | -                                                              | 24.129 | nd             | 0.05±0.02a     | nd              | 0.02<br>±0.01a |
| Hexadecanoic acid, methyl ester                   | Oily, waxy, fatty, orris                                       | 24.349 | 0.06<br>±0.02a | 0.02±0.01a     | nd              | nd             |
| Cyclononasiloxane, octadecamethyl-                | -                                                              | 24.522 | nd             | nd             | 0.02<br>±0.01   | nd             |
| Hexadecanoic acid <n->                            | Low heavy waxy, with a creamy, candle waxy nuance              | 24.574 | 0.59<br>±0.11c | 0.39<br>±0.06b | 0.27<br>±0.07ab | 0.20<br>±0.06a |
| Cyclononasiloxane, octadecamethyl-                | -                                                              | 24.671 | 0.12<br>±0.03b | 0.03<br>±0.01a | 0.10<br>±0.02b  | 0.07<br>±0.02b |
| Cyclooctasiloxane, hexadecamethyl-                | -                                                              | 25.572 | 0.20<br>±0.04b | 0.09<br>±0.02a | 0.10<br>±0.02a  | 0.06<br>±0.02a |
| Octadecanoic acid                                 | Oily, waxy                                                     | 25.795 | 0.08<br>±0.02a | nd             | 0.06<br>±0.02a  | 0.02<br>±0.02a |
| Stearic acid                                      | -                                                              | 25.805 | nd             | 0.04±0.01      | nd              | nd             |
| Cyclopropaneoctanoic acid, 2-octyl-, methyl ester | -                                                              | 28.131 | 0.16<br>±0.02  | nd             | nd              | nd             |

|                                        |   |        |                |                |                |    |
|----------------------------------------|---|--------|----------------|----------------|----------------|----|
| 13-Docosenoic acid, methyl ester, (Z)- |   | 28.141 | nd             | 0.03±0.01      | nd             | nd |
| Cyclononasiloxane, octadecamethyl-     | - | 28.466 | 0.09<br>±0.02a | 0.10<br>±0.02a | 0.29<br>±0.07b | nd |

nd – not determined; Data expressed as a mean value (n = 3) ± standard deviation. <sup>a-c</sup> – Means with different letters within a row are significantly different ( $p \leq 0.05$ ).



**Table S4.** Pearson correlations between overall acceptability and emotions response of the dark chocolate samples with volatile compounds.

| Volatile acids                         | Overall acceptability |          | Happy    |          | Sad      |          | Angry    |          | Surprised |          | Scared   |          | Disgusted |          | Contempt |          | Valence  |          |
|----------------------------------------|-----------------------|----------|----------|----------|----------|----------|----------|----------|-----------|----------|----------|----------|-----------|----------|----------|----------|----------|----------|
|                                        | <i>r</i>              | <i>p</i> | <i>r</i> | <i>p</i> | <i>r</i> | <i>p</i> | <i>r</i> | <i>p</i> | <i>r</i>  | <i>p</i> | <i>r</i> | <i>p</i> | <i>r</i>  | <i>p</i> | <i>r</i> | <i>p</i> | <i>r</i> | <i>p</i> |
| Acetic acid                            | 0.527                 | 0.078    | -0.031   | 0.923    | 0.482    | 0.112    | -0.019   | 0.952    | -0.396    | 0.203    | -        | 0.354    | .688*     | 0.013    | -        | 0.296    | -        | 0.756    |
|                                        |                       |          |          |          |          |          |          |          |           |          | 0.294    |          |           | 0.329    |          |          | 0.101    |          |
| Propanoic acid, 2-methyl-              | .629*                 | 0.028    | -0.34    | 0.279    | 0.434    | 0.158    | -0.013   | 0.967    | -.826**   | 0.001    | -        | 0.009    | .645*     | 0.024    | -.704*   | 0.011    | -        | 0.239    |
|                                        |                       |          |          |          |          |          |          |          |           |          | .718**   |          |           |          |          |          | 0.368    |          |
| 2,3-Butanediol, [R-(R*, R*)]           | -0.567                | 0.055    | -0.053   | 0.871    | 0.214    | 0.505    | .650*    | 0.022    | -0.444    | 0.148    | -        | 0.893    | -         | 0.723    | 0.037    | 0.908    | 0.412    | 0.183    |
|                                        |                       |          |          |          |          |          |          |          |           |          | 0.044    |          | 0.114     |          |          |          |          |          |
| 2,3-Butanediol                         | 0.219                 | 0.494    | -0.403   | 0.194    | -.709**  | 0.01     | 0.14     | 0.664    | .825**    | 0.001    | .750**   | 0.005    | -         | 0.067    | 0.301    | 0.341    | -.616*   | 0.033    |
|                                        |                       |          |          |          |          |          |          |          |           |          |          |          | 0.544     |          |          |          |          |          |
| Acetic acid, ethoxyhydroxy-ethyl ester | .653*                 | 0.021    | -0.308   | 0.33     | 0.433    | 0.159    | -0.081   | 0.802    | -.801**   | 0.002    | -        | 0.007    | .661*     | 0.019    | -.701*   | 0.011    | -        | 0.239    |
|                                        |                       |          |          |          |          |          |          |          |           |          | .732**   |          |           |          |          |          | 0.369    |          |
| Lactate <ethyl>                        | .655*                 | 0.021    | -0.307   | 0.332    | 0.436    | 0.156    | -0.081   | 0.803    | -.801**   | 0.002    | -        | 0.007    | .665*     | 0.018    | -.701*   | 0.011    | -        | 0.24     |
|                                        |                       |          |          |          |          |          |          |          |           |          | .731**   |          |           |          |          |          | 0.368    |          |
| 2,3-Butanediol, [S-(R*, R*)]           | -0.494                | 0.103    | .917**   | 0        | 0.307    | 0.332    | -.725**  | 0.008    | 0.073     | 0.823    | -        | 0.375    | 0.163     | 0.614    | 0.232    | 0.468    | .856**   | 0        |
|                                        |                       |          |          |          |          |          |          |          |           |          | 0.281    |          |           |          |          |          |          |          |
| Threo-3-bromo-2-pentanol               | -0.474                | 0.119    | -0.293   | 0.356    | -0.077   | 0.811    | .888**   | 0        | -0.069    | 0.832    | 0.399    | 0.199    | -         | 0.202    | 0.27     | 0.396    | 0.133    | 0.679    |
|                                        |                       |          |          |          |          |          |          |          |           |          |          |          | 0.397     |          |          |          |          |          |
| Butanoic acid, 3-methyl-               | -.813**               | 0.001    | .749**   | 0.005    | 0.226    | 0.481    | -0.206   | 0.521    | 0.058     | 0.858    | -        | 0.931    | -         | 0.739    | 0.388    | 0.212    | .942**   | 0        |
|                                        |                       |          |          |          |          |          |          |          |           |          | 0.028    |          | 0.108     |          |          |          |          |          |
| Pentanoic acid, 3-methyl-              | 0.568                 | 0.054    | -0.34    | 0.28     | 0.334    | 0.289    | -0.087   | 0.789    | -.782**   | 0.003    | -        | 0.006    | 0.527     | 0.079    | -.691*   | 0.013    | -        | 0.216    |
|                                        |                       |          |          |          |          |          |          |          |           |          | .738**   |          |           |          |          |          | 0.385    |          |
| Butanoic acid, 3-methyl-               | -0.503                | 0.096    | .905**   | 0        | 0.292    | 0.356    | -.726**  | 0.008    | 0.07      | 0.828    | -        | 0.368    | 0.157     | 0.625    | 0.223    | 0.486    | .851**   | 0        |
|                                        |                       |          |          |          |          |          |          |          |           |          | 0.286    |          |           |          |          |          |          |          |
| Butyric acid <2-methyl->               | 0.487                 | 0.109    | 0.27     | 0.396    | 0.099    | 0.759    | -.873**  | 0        | 0.031     | 0.925    | -        | 0.177    | 0.406     | 0.19     | -        | 0.402    | -        | 0.673    |
|                                        |                       |          |          |          |          |          |          |          |           |          | 0.417    |          |           |          | 0.267    |          | 0.136    |          |
| 1-Butanol, 3-methyl-, acetate          | 0.299                 | 0.345    | -0.323   | 0.305    | -.676*   | 0.016    | -0.084   | 0.796    | .778**    | 0.003    | .579*    | 0.049    | -         | 0.18     | 0.183    | 0.569    | -.619*   | 0.032    |
|                                        |                       |          |          |          |          |          |          |          |           |          |          |          | 0.415     |          |          |          |          |          |
| L-lactic acid                          | .639*                 | 0.025    | -0.279   | 0.381    | 0.446    | 0.146    | -0.111   | 0.731    | -.809**   | 0.001    | -        | 0.005    | .673*     | 0.016    | -.702*   | 0.011    | -        | 0.279    |
|                                        |                       |          |          |          |          |          |          |          |           |          | .754**   |          |           |          |          |          | 0.341    |          |



|                                 |        |       |         |       |          |       |         |       |         |       |        |       |        |       |        |       |        |       |
|---------------------------------|--------|-------|---------|-------|----------|-------|---------|-------|---------|-------|--------|-------|--------|-------|--------|-------|--------|-------|
| Decane, 2,3,4-trimethyl-        | -0.023 | 0.943 | -0.516  | 0.086 | -0.735** | 0.006 | 0.485   | 0.11  | .713**  | 0.009 | .805** | 0.002 | -.662* | 0.019 | 0.329  | 0.296 | -      | 0.076 |
|                                 |        |       |         |       |          |       |         |       |         |       |        |       |        |       |        |       | 0.531  |       |
| 2-Heptanol, acetate             | -0.255 | 0.423 | -0.431  | 0.162 | -.634*   | 0.027 | .603*   | 0.038 | .633*   | 0.027 | .865** | 0     | -      | 0.006 | 0.384  | 0.217 | -      | 0.33  |
|                                 |        |       |         |       |          |       |         |       |         |       |        |       | .742** |       |        |       | 0.308  |       |
| Pentane, 2,2-oxybis-            | 0.559  | 0.059 | -0.342  | 0.276 | 0.323    | 0.305 | -0.087  | 0.788 | -.779** | 0.003 | -      | 0.006 | 0.512  | 0.089 | -.689* | 0.013 | -      | 0.215 |
|                                 |        |       |         |       |          |       |         |       |         |       | .736** |       |        |       |        |       | 0.386  |       |
| Pentadecane                     | .636*  | 0.026 | -0.318  | 0.314 | 0.411    | 0.185 | -0.083  | 0.798 | -.801** | 0.002 | -      | 0.006 | .631*  | 0.028 | -.703* | 0.011 | -      | 0.23  |
|                                 |        |       |         |       |          |       |         |       |         |       | .737** |       |        |       |        |       | 0.375  |       |
| Heptadecane                     | 0.31   | 0.327 | -0.318  | 0.314 | -.666*   | 0.018 | -0.083  | 0.798 | .787**  | 0.002 | .593*  | 0.042 | -      | 0.18  | 0.201  | 0.531 | -.618* | 0.032 |
|                                 |        |       |         |       |          |       |         |       |         |       |        |       | 0.415  |       |        |       |        |       |
| Nonane, 5-(2-methylpropyl)-     | -0.501 | 0.097 | -0.313  | 0.322 | -0.117   | 0.718 | .884**  | 0     | -0.075  | 0.817 | 0.389  | 0.211 | -      | 0.17  | 0.213  | 0.507 | 0.116  | 0.72  |
|                                 |        |       |         |       |          |       |         |       |         |       |        |       | 0.424  |       |        |       |        |       |
| Ethanone, 1-(1H-pyrrol-2-yl)-   | -0.464 | 0.128 | 0.537   | 0.072 | -0.2     | 0.533 | -0.555  | 0.061 | 0.477   | 0.117 | 0.162  | 0.615 | -0.33  | 0.295 | 0.338  | 0.283 | 0.442  | 0.151 |
| 2-Pyrrolidinone                 | -0.524 | 0.08  | -0.33   | 0.294 | -0.159   | 0.621 | .864**  | 0     | -0.08   | 0.804 | 0.372  | 0.234 | -      | 0.145 | 0.144  | 0.655 | 0.095  | 0.77  |
|                                 |        |       |         |       |          |       |         |       |         |       |        |       | 0.447  |       |        |       |        |       |
| Acetophenone                    | 0.39   | 0.21  | 0.393   | 0.207 | 0.134    | 0.678 | -.933** | 0     | 0.051   | 0.874 | -0.43  | 0.163 | 0.398  | 0.2   | -      | 0.534 | -      | 0.985 |
|                                 |        |       |         |       |          |       |         |       |         |       |        |       |        |       | 0.199  |       | 0.006  |       |
| Heptanoic acid                  | .784** | 0.003 | -.782** | 0.003 | -0.242   | 0.448 | 0.314   | 0.32  | -0.011  | 0.973 | 0.139  | 0.666 | 0.059  | 0.856 | -      | 0.287 | -      | 0     |
|                                 |        |       |         |       |          |       |         |       |         |       |        |       |        |       | 0.335  |       | .943** |       |
| Pyrazine, 3-ethyl-3,5-dimethyl- | -0.506 | 0.093 | -0.316  | 0.317 | -0.124   | 0.701 | .881**  | 0     | -0.076  | 0.815 | 0.386  | 0.215 | -      | 0.165 | 0.201  | 0.531 | 0.112  | 0.728 |
|                                 |        |       |         |       |          |       |         |       |         |       |        |       | 0.428  |       |        |       |        |       |
| Pyrazine, 3-ethyl-2,5-dimethyl- | 0.025  | 0.939 | 0.262   | 0.411 | -0.46    | 0.133 | -0.536  | 0.073 | .861**  | 0     | 0.458  | 0.134 | -0.32  | 0.31  | 0.392  | 0.208 | -      | 0.798 |
|                                 |        |       |         |       |          |       |         |       |         |       |        |       |        |       |        |       | 0.083  |       |
| H-Methyldodecanol               | .596*  | 0.041 | -0.333  | 0.29  | 0.364    | 0.245 | -0.086  | 0.791 | -.792** | 0.002 | -      | 0.006 | 0.568  | 0.054 | -.698* | 0.012 | -      | 0.219 |
|                                 |        |       |         |       |          |       |         |       |         |       | .741** |       |        |       |        |       | 0.383  |       |
| 1-Heptanol, 2,4-diethyl         | 0.293  | 0.355 | -0.326  | 0.302 | -.680*   | 0.015 | -0.084  | 0.794 | .773**  | 0.003 | 0.571  | 0.053 | -      | 0.181 | 0.174  | 0.589 | -.620* | 0.032 |
|                                 |        |       |         |       |          |       |         |       |         |       |        |       | 0.414  |       |        |       |        |       |
| 2-Undecene, 2,5-dimethyl        | -0.523 | 0.081 | -0.33   | 0.295 | -0.157   | 0.625 | .865**  | 0     | -0.08   | 0.805 | 0.373  | 0.233 | -      | 0.146 | 0.148  | 0.647 | 0.096  | 0.768 |
|                                 |        |       |         |       |          |       |         |       |         |       |        |       | 0.446  |       |        |       |        |       |
| Pyrazine, tetramethyl-          | .805** | 0.002 | -.586*  | 0.045 | -0.3     | 0.343 | -0.068  | 0.833 | 0.13    | 0.687 | 0.048  | 0.882 | 0.088  | 0.785 | -      | 0.297 | -      | 0     |
|                                 |        |       |         |       |          |       |         |       |         |       |        |       |        |       | 0.328  |       | .895** |       |
| 2-Nonanone                      | -0.499 | 0.099 | -0.311  | 0.325 | -0.113   | 0.726 | .884**  | 0     | -0.074  | 0.819 | 0.39   | 0.21  | -      | 0.173 | 0.218  | 0.496 | 0.118  | 0.716 |
|                                 |        |       |         |       |          |       |         |       |         |       |        |       | 0.421  |       |        |       |        |       |

|                                               |        |       |         |       |        |       |         |       |         |       |        |       |        |       |        |       |        |       |
|-----------------------------------------------|--------|-------|---------|-------|--------|-------|---------|-------|---------|-------|--------|-------|--------|-------|--------|-------|--------|-------|
| Sulfurous acid, isobutyl 2-pentyl ester       | -0.499 | 0.099 | .910**  | 0     | 0.298  | 0.346 | -.726** | 0.008 | 0.071   | 0.826 | -      | 0.371 | 0.165  | 0.608 | 0.227  | 0.479 | .853** | 0     |
|                                               |        |       |         |       |        |       |         |       |         |       | 0.284  |       |        |       |        |       |        |       |
| 1,6-Octadien-3-ol, 3,7-dimethyl-              | .591*  | 0.043 | -.914** | 0     | -0.295 | 0.352 | .606*   | 0.037 | -0.108  | 0.738 | 0.184  | 0.567 | -      | 0.791 | -      | 0.308 | -      | 0     |
|                                               |        |       |         |       |        |       |         |       |         |       |        |       | 0.086  |       | 0.322  |       | .913** |       |
| Nonanal                                       | -0.498 | 0.1   | .912**  | 0     | 0.301  | 0.342 | -.726** | 0.008 | 0.072   | 0.825 | -      | 0.372 | 0.162  | 0.614 | 0.228  | 0.476 | .854** | 0     |
|                                               |        |       |         |       |        |       |         |       |         |       | 0.283  |       |        |       |        |       |        |       |
| 2-Isopryl-5-methylhes-2-enal                  | -0.48  | 0.114 | -0.297  | 0.349 | -0.086 | 0.79  | .887**  | 0     | -0.07   | 0.829 | 0.397  | 0.202 | -      | 0.194 | 0.257  | 0.419 | 0.129  | 0.688 |
|                                               |        |       |         |       |        |       |         |       |         |       |        |       | 0.403  |       |        |       |        |       |
| Phenethyl alcohol                             | 0.445  | 0.148 | -0.104  | 0.747 | -0.438 | 0.155 | -0.444  | 0.148 | .623*   | 0.03  | 0.285  | 0.37  | -      | 0.624 | 0.138  | 0.668 | -      | 0.1   |
|                                               |        |       |         |       |        |       |         |       |         |       |        |       | 0.158  |       |        |       | .497   |       |
| 1-Heptanol, 6-methyl-                         | -0.538 | 0.071 | .802**  | 0.002 | 0.195  | 0.544 | -.700*  | 0.011 | 0.055   | 0.866 | -      | 0.342 | 0.135  | 0.675 | 0.159  | 0.621 | .793** | 0.002 |
|                                               |        |       |         |       |        |       |         |       |         |       | 0.301  |       |        |       |        |       |        |       |
| 4H-Pyran-4-one, 2,3-dihydro-3,5-dihydroxy-6   | .673*  | 0.017 | -0.293  | 0.355 | 0.461  | 0.132 | -0.078  | 0.81  | -.796** | 0.002 | -      | 0.008 | .698*  | 0.012 | -.694* | 0.012 | -      | 0.254 |
|                                               |        |       |         |       |        |       |         |       |         |       | .719** |       |        |       |        |       | .357   |       |
| Cyclopentasiloxane, decamethyl-               | 0.214  | 0.505 | -0.212  | 0.508 | -.661* | 0.019 | -0.112  | 0.729 | .873**  | 0     | .668*  | 0.018 | -      | 0.119 | 0.319  | 0.313 | -      | 0.094 |
|                                               |        |       |         |       |        |       |         |       |         |       |        |       | 0.475  |       |        |       | .505   |       |
| Octanoic acid                                 | 0.34   | 0.279 | 0.243   | 0.447 | -0.183 | 0.568 | -.777** | 0.003 | 0.423   | 0.171 | -      | 0.848 | 0.174  | 0.588 | 0.02   | 0.951 | -0.16  | 0.619 |
|                                               |        |       |         |       |        |       |         |       |         |       | 0.062  |       |        |       |        |       |        |       |
| 3-Cyclohexen-1-ol, 4-methyl-1-(1-methylethyl) | -.678* | 0.015 | 0.557   | 0.06  | 0.199  | 0.536 | -0.098  | 0.763 | 0.02    | 0.951 | -      | 0.947 | -      | 0.988 | 0.436  | 0.156 | .802** | 0.002 |
|                                               |        |       |         |       |        |       |         |       |         |       | 0.022  |       | 0.005  |       |        |       |        |       |
| Octanoic acid, ethyl ester                    | -0.47  | 0.123 | 0.128   | 0.693 | -0.565 | 0.056 | 0.047   | 0.884 | .849**  | 0     | .721** | 0.008 | -.605* | 0.037 | .647*  | 0.023 | 0.136  | 0.673 |
|                                               |        |       |         |       |        |       |         |       |         |       |        |       |        |       |        |       |        |       |
| Tetradecane <n>                               | .636*  | 0.026 | -0.318  | 0.314 | 0.411  | 0.184 | -0.083  | 0.798 | -.801** | 0.002 | -      | 0.006 | .632*  | 0.027 | -.703* | 0.011 | -      | 0.23  |
|                                               |        |       |         |       |        |       |         |       |         |       | .738** |       |        |       |        |       | .375   |       |
| Dodecane                                      | -0.129 | 0.689 | 0.433   | 0.16  | -0.382 | 0.22  | -.662*  | 0.019 | .775**  | 0.003 | 0.308  | 0.329 | -      | 0.436 | 0.357  | 0.254 | 0.12   | 0.709 |
|                                               |        |       |         |       |        |       |         |       |         |       |        |       | 0.249  |       |        |       |        |       |
| Pentadecane <n>                               | -0.525 | 0.08  | -0.331  | 0.293 | -0.163 | 0.613 | .861**  | 0     | -0.081  | 0.803 | 0.369  | 0.238 | -      | 0.144 | 0.138  | 0.669 | 0.092  | 0.775 |
|                                               |        |       |         |       |        |       |         |       |         |       |        |       | 0.448  |       |        |       |        |       |
| Estragole                                     | 0.386  | 0.215 | 0.354   | 0.259 | 0.123  | 0.703 | -.914** | 0     | -0.013  | 0.969 | -      | 0.102 | 0.478  | 0.116 | -      | 0.287 | -      | 0.93  |
|                                               |        |       |         |       |        |       |         |       |         |       | 0.495  |       |        |       | 0.335  |       | .029   |       |
| Sulfurous acid, decyl 2-ethylhexyl ester      | .629*  | 0.029 | -0.316  | 0.317 | 0.405  | 0.191 | -0.082  | 0.799 | -.794** | 0.002 | -      | 0.007 | .623*  | 0.03  | -.696* | 0.012 | -      | 0.234 |
|                                               |        |       |         |       |        |       |         |       |         |       | .731** |       |        |       |        |       | .372   |       |
| Undecane, 2,6-dimethyl-                       | -0.538 | 0.071 | .802**  | 0.002 | 0.195  | 0.544 | -.700*  | 0.011 | 0.055   | 0.866 | -      | 0.342 | 0.135  | 0.675 | 0.159  | 0.621 | .793** | 0.002 |
|                                               |        |       |         |       |        |       |         |       |         |       | 0.301  |       |        |       |        |       |        |       |

|                                       |        |       |         |       |        |       |         |       |         |       |        |       |        |       |        |       |        |       |
|---------------------------------------|--------|-------|---------|-------|--------|-------|---------|-------|---------|-------|--------|-------|--------|-------|--------|-------|--------|-------|
| Decane, 2,6,7-trimethyl-              | -0.065 | 0.84  | -0.492  | 0.104 | -.641* | 0.025 | 0.572   | 0.052 | .634*   | 0.027 | .779** | 0.003 | -.617* | 0.033 | 0.393  | 0.206 | -      | 0.149 |
|                                       |        |       |         |       |        |       |         |       |         |       |        |       |        |       |        |       | 0.443  |       |
| Thymoquinone                          | 0.379  | 0.225 | 0.241   | 0.451 | -0.002 | 0.995 | -.831** | 0.001 | 0.067   | 0.837 | -      | 0.208 | 0.442  | 0.15  | -      | 0.241 | -      | 0.703 |
|                                       |        |       |         |       |        |       |         |       |         |       | 0.392  |       |        |       | 0.367  |       | 0.123  |       |
| Phenethyl isobutyrate                 | .606*  | 0.037 | 0.054   | 0.869 | -0.07  | 0.83  | -.719** | 0.008 | 0.158   | 0.623 | -      | 0.427 | 0.375  | 0.23  | -      | 0.365 | -      | 0.231 |
|                                       |        |       |         |       |        |       |         |       |         |       | 0.253  |       |        |       | 0.287  |       | 0.374  |       |
| Acetic acid, 2-phenylethyl ester      | -0.508 | 0.092 | -0.318  | 0.314 | -0.127 | 0.693 | .880**  | 0     | -0.076  | 0.814 | 0.385  | 0.216 | -0.43  | 0.163 | 0.196  | 0.542 | 0.111  | 0.732 |
| Nonanoic acid                         | .636*  | 0.026 | -0.088  | 0.786 | -0.193 | 0.547 | -.625*  | 0.03  | 0.216   | 0.5   | -      | 0.618 | 0.233  | 0.466 | -      | 0.349 | -      | 0.084 |
|                                       |        |       |         |       |        |       |         |       |         |       | 0.161  |       |        |       | 0.297  |       | 0.519  |       |
| 2H-Pyran-2-one, 5,6-dihydro-6-pentyl- | 0.059  | 0.856 | 0.258   | 0.418 | -0.413 | 0.182 | -.579*  | 0.049 | .767**  | 0.004 | 0.334  | 0.289 | -      | 0.457 | 0.373  | 0.232 | -      | 0.811 |
|                                       |        |       |         |       |        |       |         |       |         |       |        |       | 0.238  |       |        |       | 0.077  |       |
| Hentriacontane <n>                    | -0.53  | 0.076 | .836**  | 0.001 | 0.225  | 0.483 | -.711** | 0.01  | 0.06    | 0.854 | -      | 0.347 | 0.135  | 0.675 | 0.179  | 0.578 | .814** | 0.001 |
|                                       |        |       |         |       |        |       |         |       |         |       | 0.298  |       |        |       |        |       |        |       |
| Dodecane, 4,6-dimethyl-               | 0.021  | 0.949 | -.837** | 0.001 | -0.412 | 0.183 | .931**  | 0     | -0.027  | 0.932 | 0.405  | 0.192 | -0.43  | 0.163 | -      | 0.787 | -.583* | 0.047 |
|                                       |        |       |         |       |        |       |         |       |         |       |        |       |        |       | 0.087  |       |        |       |
| Phenol, 2-methyl-5-(1-methylethyl-)   | -0.141 | 0.661 | -0.329  | 0.296 | -.633* | 0.027 | -0.115  | 0.723 | 0.272   | 0.392 | 0.092  | 0.775 | -      | 0.081 | -      | 0.835 | -      | 0.275 |
|                                       |        |       |         |       |        |       |         |       |         |       |        |       | 0.523  |       | 0.067  |       | 0.343  |       |
| Nonane, 5-methyl-5-propyl-            | -0.4   | 0.197 | -0.24   | 0.452 | 0.005  | 0.987 | .863**  | 0     | -0.054  | 0.868 | 0.404  | 0.193 | -      | 0.3   | 0.377  | 0.227 | 0.163  | 0.612 |
|                                       |        |       |         |       |        |       |         |       |         |       |        |       | 0.327  |       |        |       |        |       |
| Nonane, 3-methyl-5-propyl-            | -.684* | 0.014 | .847**  | 0.001 | 0.293  | 0.355 | -0.402  | 0.195 | 0.049   | 0.88  | -      | 0.694 | -      | 0.978 | 0.297  | 0.349 | .918** | 0     |
|                                       |        |       |         |       |        |       |         |       |         |       | 0.127  |       | 0.009  |       |        |       |        |       |
| Pentadecane <n>                       | 0.361  | 0.249 | -0.276  | 0.384 | -.587* | 0.045 | -0.075  | 0.818 | .814**  | 0.001 | .658*  | 0.02  | -      | 0.19  | 0.297  | 0.349 | -.589* | 0.044 |
|                                       |        |       |         |       |        |       |         |       |         |       |        |       | 0.406  |       |        |       |        |       |
| Tridecane <n>                         | .701*  | 0.011 | -0.216  | 0.5   | 0.534  | 0.074 | -0.061  | 0.85  | -.723** | 0.008 | -.624* | 0.03  | .788** | 0.002 | -.622* | 0.031 | -      | 0.357 |
|                                       |        |       |         |       |        |       |         |       |         |       |        |       |        |       |        |       | 0.292  |       |
| Thymol                                | -0.27  | 0.396 | -0.166  | 0.605 | -0.338 | 0.283 | -0.199  | 0.536 | -0.208  | 0.516 | -      | 0.157 | -0.05  | 0.877 | -      | 0.316 | -      | 0.837 |
|                                       |        |       |         |       |        |       |         |       |         |       | 0.436  |       |        |       | 0.317  |       | 0.066  |       |
| Octadecane, 1-(ethenyl-oxo-)          | -0.43  | 0.163 | -0.261  | 0.413 | -0.025 | 0.938 | .877**  | 0     | -0.06   | 0.854 | 0.404  | 0.193 | -      | 0.258 | 0.339  | 0.28  | 0.153  | 0.635 |
|                                       |        |       |         |       |        |       |         |       |         |       |        |       | 0.354  |       |        |       |        |       |
| Cyclohexasiloxane, dodecamethyl-      | -.612* | 0.035 | .869**  | 0     | 0.149  | 0.643 | -.606*  | 0.037 | 0.261   | 0.413 | -0.07  | 0.828 | 0.007  | 0.983 | 0.382  | 0.22  | .850** | 0     |
| Nonane, 3-methyl-5-propyl-            | 0.018  | 0.956 | 0.284   | 0.371 | -0.397 | 0.201 | -0.53   | 0.076 | .834**  | 0.001 | 0.468  | 0.125 | -      | 0.348 | 0.439  | 0.154 | -      | 0.929 |
|                                       |        |       |         |       |        |       |         |       |         |       |        |       | 0.297  |       |        |       | 0.029  |       |

|                                                  |        |       |        |       |          |       |          |       |          |       |         |       |        |       |         |       |         |       |
|--------------------------------------------------|--------|-------|--------|-------|----------|-------|----------|-------|----------|-------|---------|-------|--------|-------|---------|-------|---------|-------|
| Eicosane                                         | 0.526  | 0.079 | -0.347 | 0.269 | 0.289    | 0.362 | -0.087   | 0.787 | -0.762** | 0.004 | -       | 0.007 | 0.465  | 0.128 | -0.676* | 0.016 | -       | 0.215 |
|                                                  |        |       |        |       |          |       |          |       |          |       | .728**  |       |        |       |         |       |         | 0.386 |
| Dodecane, 4,6-dimethyl-                          | -0.526 | 0.079 | -0.332 | 0.292 | -0.164   | 0.611 | .861**   | 0     | -0.081   | 0.803 | 0.369   | 0.238 | -      | 0.143 | 0.136   | 0.673 | 0.092   | 0.776 |
|                                                  |        |       |        |       |          |       |          |       |          |       |         |       | 0.449  |       |         |       |         |       |
| 1-Alanine, N-cyclopropyl-carbonyl-, methyl ester | 0.032  | 0.921 | 0.047  | 0.885 | -0.599*  | 0.039 | -0.407   | 0.189 | .772**   | 0.003 | 0.387   | 0.214 | -      | 0.189 | 0.196   | 0.542 | -       | 0.415 |
|                                                  |        |       |        |       |          |       |          |       |          |       |         |       | 0.407  |       |         |       |         | 0.259 |
| 3H-Pyrazol-3-one, 2,4-dihydro-2,5-dimethyl       | -0.4   | 0.197 | -0.24  | 0.452 | 0.005    | 0.987 | .863**   | 0     | -0.054   | 0.868 | 0.404   | 0.193 | -      | 0.3   | 0.377   | 0.227 | 0.163   | 0.612 |
|                                                  |        |       |        |       |          |       |          |       |          |       |         |       | 0.327  |       |         |       |         |       |
| Sarcosine, N-cyclopropyl-carbonyl-, octyl ester  | .693*  | 0.013 | -0.244 | 0.444 | 0.509    | 0.091 | -0.067   | 0.835 | -0.751** | 0.005 | -0.660* | 0.02  | .757** | 0.004 | -0.650* | 0.022 | -       | 0.317 |
|                                                  |        |       |        |       |          |       |          |       |          |       |         |       |        |       |         |       |         | 0.316 |
| Decanoic acid <n->                               | -0.039 | 0.905 | .705*  | 0.01  | 0.192    | 0.55  | -0.936** | 0     | 0.15     | 0.642 | -       | 0.292 | 0.242  | 0.45  | 0.125   | 0.7   | 0.438   | 0.155 |
|                                                  |        |       |        |       |          |       |          |       |          |       | 0.332   |       |        |       |         |       |         |       |
| Propanoic acid, 2-methyl-, 3-hydroxy-2,4,4-tri   | -0.089 | 0.783 | .791** | 0.002 | 0.354    | 0.259 | -0.935** | 0     | -0.069   | 0.831 | -       | 0.074 | 0.389  | 0.212 | -       | 0.942 | 0.56    | 0.058 |
|                                                  |        |       |        |       |          |       |          |       |          |       | 0.533   |       |        |       | 0.024   |       |         |       |
| Copaene                                          | 0.221  | 0.49  | -0.347 | 0.269 | -0.718** | 0.009 | -0.087   | 0.787 | .695*    | 0.012 | 0.466   | 0.127 | -      | 0.202 | 0.063   | 0.846 | -0.609* | 0.036 |
|                                                  |        |       |        |       |          |       |          |       |          |       |         |       | 0.396  |       |         |       |         |       |
| Hexadecane, 1-iodo-                              | 0.291  | 0.359 | -0.327 | 0.3   | -0.683*  | 0.014 | -0.085   | 0.794 | .771**   | 0.003 | 0.567   | 0.055 | -      | 0.182 | 0.169   | 0.599 | -0.620* | 0.032 |
|                                                  |        |       |        |       |          |       |          |       |          |       |         |       | 0.413  |       |         |       |         |       |
| Methylengenol                                    | -0.049 | 0.881 | 0.172  | 0.592 | -0.046   | 0.887 | -0.524   | 0.08  | -0.144   | 0.655 | -       | 0.096 | 0.181  | 0.574 | -       | 0.611 | 0.096   | 0.767 |
|                                                  |        |       |        |       |          |       |          |       |          |       | 0.503   |       |        |       | 0.164   |       |         |       |
| 2,4,7,9-Tetramethyl-5-decyn-4,7-diol             | 0.151  | 0.638 | 0.483  | 0.112 | 0.089    | 0.784 | -0.587*  | 0.045 | 0.359    | 0.252 | 0.035   | 0.914 | 0.263  | 0.409 | 0.062   | 0.849 | 0.176   | 0.583 |
|                                                  |        |       |        |       |          |       |          |       |          |       |         |       |        |       |         |       |         |       |
| 1-Heptafluorobutyryloxy-decane                   | 0.485  | 0.11  | -0.351 | 0.264 | 0.248    | 0.436 | -0.087   | 0.787 | -0.740** | 0.006 | -       | 0.009 | 0.408  | 0.188 | -0.659* | 0.02  | -       | 0.218 |
|                                                  |        |       |        |       |          |       |          |       |          |       | .715**  |       |        |       |         |       |         | 0.384 |
| Tridecanol <n->                                  | -0.293 | 0.355 | .915** | 0     | 0.446    | 0.147 | -0.602*  | 0.038 | 0.089    | 0.783 | -       | 0.579 | 0.137  | 0.67  | 0.315   | 0.319 | .771**  | 0.003 |
|                                                  |        |       |        |       |          |       |          |       |          |       | 0.179   |       |        |       |         |       |         |       |
| Cycloheptasiloxane, tetradecamethyl-             | -0.5   | 0.098 | .597*  | 0.04  | -0.295   | 0.352 | -0.727** | 0.007 | 0.493    | 0.104 | 0.005   | 0.988 | -      | 0.509 | 0.195   | 0.545 | 0.443   | 0.149 |
|                                                  |        |       |        |       |          |       |          |       |          |       |         |       | 0.212  |       |         |       |         |       |
| 2-methylhexacosane                               | 0.386  | 0.215 | -0.24  | 0.452 | -0.516   | 0.086 | -0.067   | 0.837 | .810**   | 0.001 | .685*   | 0.014 | -      | 0.212 | 0.355   | 0.258 | -       | 0.063 |
|                                                  |        |       |        |       |          |       |          |       |          |       |         |       | 0.389  |       |         |       |         | 0.552 |
| Eicosane                                         | -0.196 | 0.541 | 0.225  | 0.483 | 0.571    | 0.052 | -0.042   | 0.896 | -0.794** | 0.002 | -0.705* | 0.01  | 0.44   | 0.152 | -       | 0.481 | 0.474   | 0.12  |
|                                                  |        |       |        |       |          |       |          |       |          |       |         |       |        |       | 0.226   |       |         |       |
| Phenol, 2,4-bis(1,1-dimethylethyl-)              | -0.264 | 0.406 | .887** | 0     | 0.446    | 0.146 | -0.571   | 0.052 | 0.088    | 0.786 | -       | 0.613 | 0.189  | 0.557 | 0.313   | 0.321 | .739**  | 0.006 |
|                                                  |        |       |        |       |          |       |          |       |          |       | 0.163   |       |        |       |         |       |         |       |

|                                        |         |       |        |       |         |       |         |       |         |       |        |       |        |       |        |       |        |       |
|----------------------------------------|---------|-------|--------|-------|---------|-------|---------|-------|---------|-------|--------|-------|--------|-------|--------|-------|--------|-------|
| Diethyl Phthalate                      | .585*   | 0.046 | -0.397 | 0.201 | -0.013  | 0.967 | -0.322  | 0.307 | -0.502  | 0.096 | -.662* | 0.019 | 0.423  | 0.171 | -      | 0.001 | -.581* | 0.047 |
|                                        |         |       |        |       |         |       |         |       |         |       |        |       |        |       | .833** |       |        |       |
| Heptadecane, 2,6,10,15-tetramethyl-    | 0.399   | 0.199 | -0.083 | 0.797 | -0.201  | 0.531 | -0.03   | 0.926 | .655*   | 0.021 | .649*  | 0.022 | -      | 0.405 | 0.476  | 0.118 | -      | 0.278 |
|                                        |         |       |        |       |         |       |         |       |         |       |        |       | 0.265  |       |        |       | 0.341  |       |
| Cyclooctasiloxane, hexadecamethyl-     | -0.351  | 0.264 | 0.498  | 0.099 | -0.035  | 0.913 | -.777** | 0.003 | -0.041  | 0.899 | -      | 0.096 | 0.149  | 0.643 | -0.15  | 0.642 | 0.428  | 0.165 |
|                                        |         |       |        |       |         |       |         |       |         |       | 0.503  |       |        |       |        |       |        |       |
| Tetradecanoic acid                     | -0.443  | 0.149 | .746** | 0.005 | 0.148   | 0.647 | -.806** | 0.002 | -0.014  | 0.966 | -      | 0.135 | 0.175  | 0.587 | 0.002  | 0.994 | .673*  | 0.016 |
|                                        |         |       |        |       |         |       |         |       |         |       | 0.457  |       |        |       |        |       |        |       |
| n-Nanodecanol-1                        | -0.522  | 0.082 | 0.528  | 0.078 | 0.012   | 0.971 | -0.563  | 0.056 | 0.022   | 0.946 | -      | 0.371 | 0.079  | 0.807 | 0.035  | 0.913 | .592*  | 0.042 |
|                                        |         |       |        |       |         |       |         |       |         |       | 0.284  |       |        |       |        |       |        |       |
| 2-Propanol, 1-chloro-, phosphate (3:1) | 0.372   | 0.233 | -0.299 | 0.346 | 0.11    | 0.735 | -0.18   | 0.575 | -0.53   | 0.076 | -      | 0.074 | 0.343  | 0.275 | -.648* | 0.023 | -0.34  | 0.279 |
|                                        |         |       |        |       |         |       |         |       |         |       | 0.534  |       |        |       |        |       |        |       |
| Cyclononasiloxane, octadecamethyl-     | -0.147  | 0.648 | .666*  | 0.018 | 0.442   | 0.15  | -.785** | 0.003 | -0.369  | 0.238 | -      | 0.007 | 0.492  | 0.105 | -      | 0.604 | .587*  | 0.045 |
|                                        |         |       |        |       |         |       |         |       |         |       | .733** |       |        |       | 0.167  |       |        |       |
| Benzoic acid, hexyl ester              | -.635*  | 0.027 | 0.055  | 0.865 | 0.09    | 0.781 | 0.256   | 0.421 | -0.389  | 0.211 | -      | 0.517 | -      | 0.82  | -      | 0.997 | 0.461  | 0.132 |
|                                        |         |       |        |       |         |       |         |       |         |       | 0.208  |       | 0.074  |       | 0.001  |       |        |       |
| Pentadecanoic acid                     | -0.522  | 0.082 | 0.528  | 0.078 | 0.012   | 0.971 | -0.563  | 0.056 | 0.022   | 0.946 | -      | 0.371 | 0.079  | 0.807 | 0.035  | 0.913 | .592*  | 0.042 |
|                                        |         |       |        |       |         |       |         |       |         |       | 0.284  |       |        |       |        |       |        |       |
| Morpholine, 4-octadecyl-               | 0.522   | 0.082 | -0.306 | 0.333 | .581*   | 0.047 | 0.385   | 0.216 | -.729** | 0.007 | -      | 0.204 | .637*  | 0.026 | -      | 0.302 | -      | 0.579 |
|                                        |         |       |        |       |         |       |         |       |         |       | 0.394  |       |        |       | 0.325  |       | 0.178  |       |
| Hexadecanoic acid, methyl ester        | -0.423  | 0.171 | .637*  | 0.026 | 0.204   | 0.525 | -.728** | 0.007 | -0.199  | 0.536 | -      | 0.059 | 0.238  | 0.457 | -      | 0.799 | .636*  | 0.026 |
|                                        |         |       |        |       |         |       |         |       |         |       | 0.559  |       |        |       | 0.082  |       |        |       |
| Cyclononasiloxane, octadecamethyl-     | 0.154   | 0.634 | -0.35  | 0.265 | -.717** | 0.009 | -0.086  | 0.79  | .602*   | 0.038 | 0.362  | 0.248 | -      | 0.244 | -      | 0.93  | -      | 0.051 |
|                                        |         |       |        |       |         |       |         |       |         |       |        |       | 0.365  |       | 0.028  |       | 0.574  |       |
| Hexadecanoic acid <n>                  | -0.244  | 0.444 | .754** | 0.005 | 0.337   | 0.284 | -.879** | 0     | -0.201  | 0.531 | -.622* | 0.031 | 0.386  | 0.215 | -      | 0.647 | .628*  | 0.029 |
|                                        |         |       |        |       |         |       |         |       |         |       |        |       |        |       | 0.148  |       |        |       |
| Cyclononasiloxane, octadecamethyl-     | -.714** | 0.009 | 0.379  | 0.224 | -0.544  | 0.067 | -0.39   | 0.21  | .616*   | 0.033 | 0.276  | 0.386 | -      | 0.072 | 0.275  | 0.387 | 0.357  | 0.255 |
|                                        |         |       |        |       |         |       |         |       |         |       |        |       | 0.537  |       |        |       |        |       |
| Cyclooctasiloxane, hexadecamethyl-     | -0.285  | 0.369 | .824** | 0.001 | 0.209   | 0.514 | -.840** | 0.001 | 0.192   | 0.549 | -      | 0.488 | 0.229  | 0.473 | 0.14   | 0.665 | .652*  | 0.022 |
|                                        |         |       |        |       |         |       |         |       |         |       | 0.222  |       |        |       |        |       |        |       |
| Octadecanoic acid                      | -0.411  | 0.184 | .591*  | 0.043 | -0.255  | 0.423 | -.606*  | 0.037 | .635*   | 0.027 | 0.204  | 0.524 | -      | 0.505 | 0.44   | 0.153 | 0.434  | 0.158 |
|                                        |         |       |        |       |         |       |         |       |         |       |        |       | 0.214  |       |        |       |        |       |
| Stearic acid                           | .698*   | 0.012 | -0.186 | 0.563 | 0.549   | 0.065 | -0.054  | 0.867 | -.685*  | 0.014 | -.580* | 0.048 | .804** | 0.002 | -.586* | 0.045 | -      | 0.407 |
|                                        |         |       |        |       |         |       |         |       |         |       |        |       |        |       |        |       | 0.264  |       |

|                                                   |       |       |        |       |        |       |         |       |        |       |        |       |       |       |        |       |        |       |
|---------------------------------------------------|-------|-------|--------|-------|--------|-------|---------|-------|--------|-------|--------|-------|-------|-------|--------|-------|--------|-------|
| Cyclopropaneoctanoic acid, 2-octyl-, methyl ester | -0.47 | 0.123 | .937** | 0     | 0.338  | 0.283 | -.721** | 0.008 | 0.077  | 0.812 | -0.27  | 0.396 | 0.167 | 0.603 | 0.252  | 0.43  | .860** | 0.322 |
| 13-Docosenoic acid, methyl ester, (Z)-            | 0.42  | 0.174 | -0.351 | 0.263 | 0.186  | 0.562 | -0.086  | 0.789 | -.697* | 0.012 | -.686* | 0.014 | 0.321 | 0.31  | -.624* | 0.03  | -      | 0.229 |
| Cyclononasiloxane, octa-decamethyl-               | 0.463 | 0.13  | -0.158 | 0.623 | -0.474 | 0.119 | -0.404  | 0.193 | .617*  | 0.033 | 0.288  | 0.363 | -     | 0.772 | 0.015  | 0.964 | -      | 0.063 |
|                                                   |       |       |        |       |        |       |         |       |        |       |        |       | 0.094 |       |        |       | 0.552  |       |

r – Pearson correlation; p – significance; correlation significant. when  $p \leq 0.05$  (\*) or  $p \leq 0.01$  (\*\*).

2

3
